# Supplementary material for: Multicolor and bright white upconversion luminescence from rice-shaped lanthanide doped BiPO4 submicron particles
Source: Royal Society of Chemistry journal article supplement (doi:10.1039/c3dt51010g), 2013-01-01
Supplement: c3dt51010g.pdf [file c3dt51010g.pdf]

# Multicolor and bright white upconversion luminescence from rice-shaped lanthanide doped BiPO<sub>4</sub> submicron particles

Zhuo Wang,<sup>a,b</sup> Jing Feng,<sup>a</sup> Min Pang,<sup>a,b</sup> Shunhao Pan<sup>a,b</sup> and Hongjie Zhang,<sup>\*a</sup>

<sup>a</sup>State Key Laboratory of Rare Earth Resource Utilization, Changchun Institute of Applied Chemistry, Chinese Academy of Sciences, 5625 Renmin Street, Changchun 130022, China. Fax: 86-431-85698041; Tel: 86-431-85262127; Email:

[hongjie@ciac.jl.cn](mailto:hongjie@ciac.jl.cn)

<sup>b</sup>Graduate School of the Chinese Academy of Sciences, Beijing, 100039, China

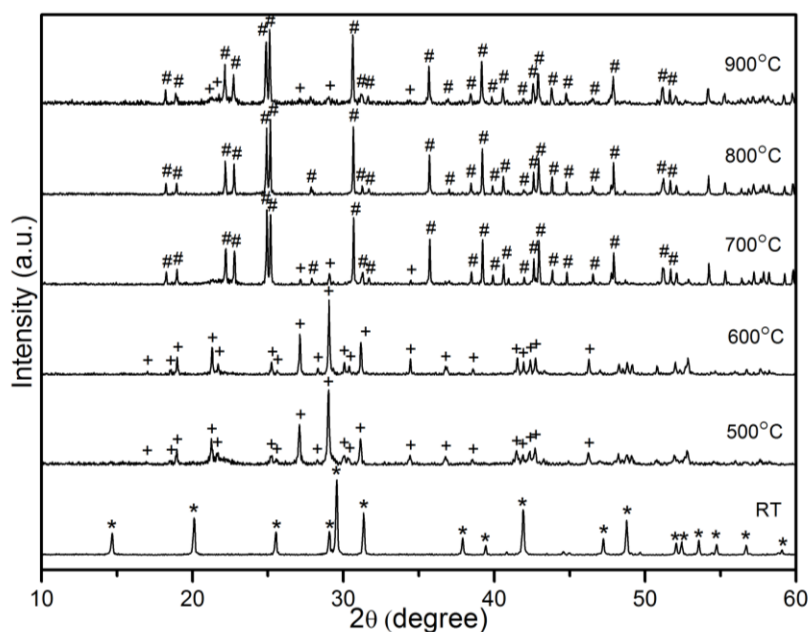

**Fig. S1** XRD patterns of BiPO<sub>4</sub> prepared at room temperature (RT) and after calcination at given temperatures. Symbols of \*, + and # represent the standard diffraction lines of HP, LTMP and HTMP BiPO<sub>4</sub> respectively.

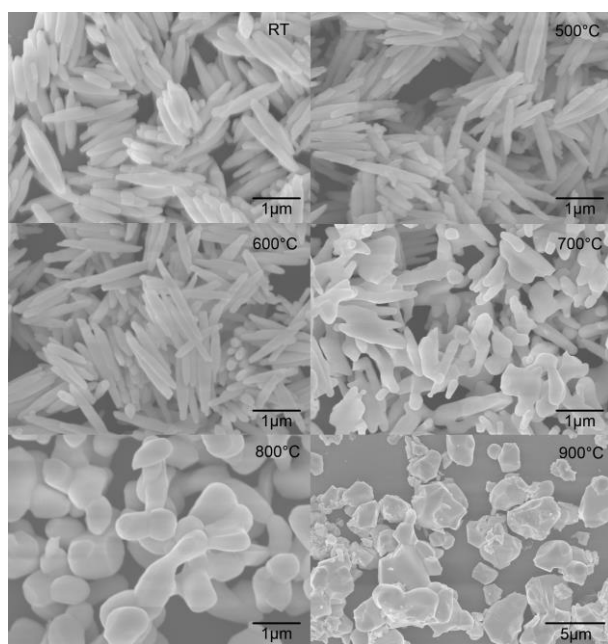

**Fig. S2** SEM images of undoped BiPO<sub>4</sub> particles obtained at different temperature

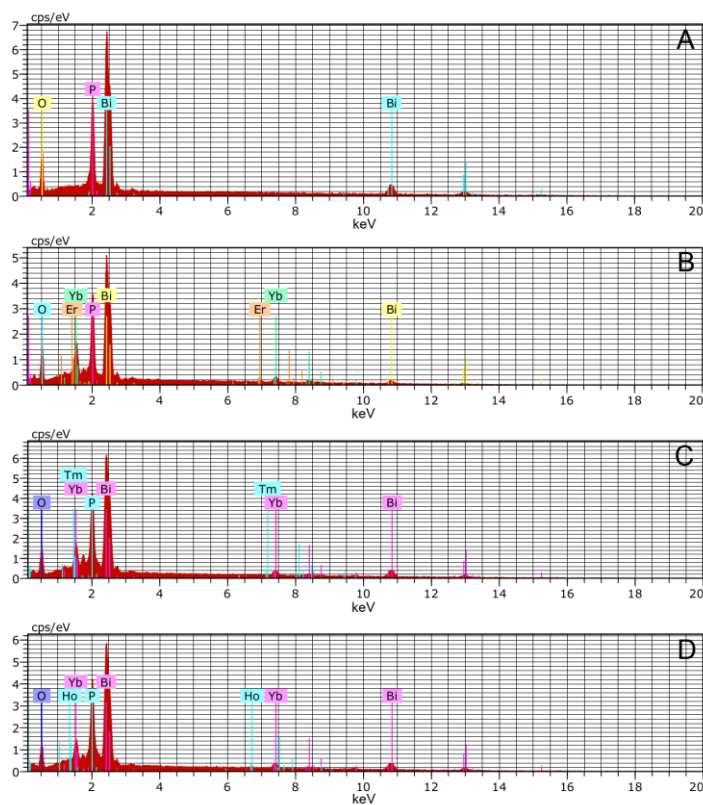

**Fig. S2** X-ray Energy-dispersive (EDX) spectroscopy of (A) undoped

BiPO<sub>4</sub>, (B) BiPO<sub>4</sub>:20% Yb<sup>3+</sup>/2% Er<sup>3+</sup>, (C) BiPO<sub>4</sub>:20% Yb<sup>3+</sup>/0.5% Tm<sup>3+</sup> and  
(D) BiPO<sub>4</sub>:20% Yb<sup>3+</sup>/2% Ho<sup>3+</sup> obtained at room temperature.
